1 **In Vitro Evaluation and Mitigation of Niclosamide's Liabilities as a COVID-19 Treatment.**

2

3 Jesse W. Wotring<sup>1</sup>, Sean M. McCarty<sup>1</sup>, Khadija Shafiq<sup>1</sup>, Charles J. Zhang<sup>1</sup>, Theophilus Nguyen<sup>2</sup>,  
4 Sophia R. Meyer<sup>1</sup>, Reid Fursmidt<sup>2</sup>, Carmen Mirabelli<sup>3</sup>, Martin C. Clasby<sup>1</sup>, Christiane E. Wobus<sup>3</sup>,  
5 Matthew J. O'Meara<sup>4</sup>, Jonathan Z. Sexton<sup>1,2,5</sup> \*

6

7 <sup>1</sup> Department of Medicinal Chemistry, College of Pharmacy, University of Michigan, Ann  
8 Arbor, MI, 48109, USA.

9 <sup>2</sup>Department of Internal Medicine, Gastroenterology and Hepatology, Michigan Medicine at the  
10 University of Michigan, Ann Arbor, MI, 48109, USA.

11 <sup>3</sup>Department of Microbiology and Immunology, University of Michigan, Ann Arbor, MI, USA.

12 <sup>4</sup>Department of Computational Medicine and Bioinformatics, University of Michigan, Ann  
13 Arbor, MI 48109, USA.

14 <sup>5</sup>U-M Center for Drug Repurposing, University of Michigan, Ann Arbor, MI, 48109, USA.

15 \* Corresponding author: [jzsexton@med.umich.edu](mailto:jzsexton@med.umich.edu)

16

17

18

19

20

21

22

23

24

25

26

27

28

29

30 **Abstract**

31 Niclosamide, an FDA-approved oral anthelmintic drug, has broad biological activity including  
32 anticancer, antibacterial, and antiviral properties. Niclosamide has also been identified as a  
33 potent inhibitor of SARS-CoV-2 infection *in vitro*, generating interest in its use for the treatment  
34 or prevention of COVID-19. Unfortunately, there are several potential issues with using  
35 niclosamide for COVID-19, including low bioavailability, significant polypharmacology, high  
36 cellular toxicity, and unknown efficacy against emerging SARS-CoV-2 variants of concern. In  
37 this study, we used high-content imaging-based immunofluorescence assays in two different cell  
38 models to assess these limitations and evaluate the potential for using niclosamide as a COVID-  
39 19 antiviral. We show that despite promising preliminary reports, the antiviral efficacy of  
40 niclosamide overlaps with its cytotoxicity giving it a poor *in vitro* selectivity index for anti-  
41 SARS-CoV-2 inhibition. We also show that niclosamide has significantly variable potency  
42 against the different SARS-CoV-2 variants of concern and is most potent against variants with  
43 enhanced cell-to-cell spread including B.1.1.7. Finally, we report the activity of 33 niclosamide  
44 analogs, several of which have reduced cytotoxicity and increased potency relative to  
45 niclosamide. A preliminary structure-activity relationship analysis reveals dependence on a  
46 protonophore for antiviral efficacy, which implicates nonspecific endolysosomal neutralization  
47 as a dominant mechanism of action. Further single-cell morphological profiling suggests  
48 niclosamide also inhibits viral entry and cell-to-cell spread by syncytia. Altogether, our results  
49 suggest that niclosamide is not an ideal candidate for the treatment of COVID-19, but that there  
50 is potential for developing improved analogs with higher clinical translational potential in the  
51 future.

52 **Key Words: Niclosamide, SARS-CoV-2, COVID-19, Polypharmacology, Drug Repurposing**

## 53 **Importance**

54 There is still an urgent need for effective anti-SARS-CoV-2 therapeutics due to waning vaccine  
55 efficacy, the emergence of variants of concern, and limited efficacy of existing antivirals. One  
56 potential therapeutic option is niclosamide, an FDA approved anthelmintic compound that has  
57 shown promising anti-SARS-CoV-2 activity in cell-based assays. Unfortunately, there are  
58 significant barriers for the clinical utility of niclosamide as a COVID-19 therapeutic. Our work  
59 emphasizes these limitations by showing that niclosamide has high cytotoxicity at antiviral  
60 concentrations, variable potency against variants of concern, and significant polypharmacology  
61 as a result of its activity as a nonspecific protonophore. Some of these clinical limitations can be  
62 mitigated, however, through structural modifications to the niclosamide scaffold, which we  
63 demonstrate through a preliminary structure activity relationship analysis. Overall, we show that  
64 niclosamide is not a suitable candidate for the treatment of COVID-19, but that structural  
65 analogs with improved drug properties may have higher clinical-translational potential.

## 66 **Introduction**

67 Since it emerged as a novel betacoronavirus in late 2019, Severe Acute Respiratory Syndrome  
68 Coronavirus 2 (SARS-CoV-2) has caused a global pandemic<sup>1</sup>. COVID-19, the disease caused by  
69 SARS-CoV-2 infection, presents as varying symptoms with different degrees of severity ranging  
70 from dry cough and difficulty breathing to acute cardiac injury and refractory pulmonary  
71 failure<sup>2,3</sup>. As of April 2022, COVID-19 has caused the death of over six million individuals  
72 worldwide<sup>4</sup> and this death toll continues to increase as new SARS-CoV-2 Variants of Concern  
73 (VOCs) emerge with enhanced transmissibility and increased adaptive immune escape<sup>5</sup>.

74 The deadly impact of COVID-19 has created a need to identify potential antiviral treatments for  
75 SARS-CoV-2 infection. This has culminated in the development and FDA-  
76 authorization/approval of several vaccines<sup>6</sup>, and three small-molecule antiviral medications  
77 including remdesivir<sup>7</sup>, molnupiravir<sup>8</sup>, and Paxlovid<sup>9</sup>. Unfortunately, because of limited  
78 worldwide vaccine availability<sup>10</sup>, the modest clinical efficacy of existing antivirals<sup>8,9,11,12</sup>, and the  
79 potential resistance of SARS-CoV-2 variants<sup>13,14</sup>, additional therapeutics are urgently needed to  
80 help stop the spread of the virus.

81 A promising strategy for identifying new therapies with the potential for rapid deployment is  
82 drug repurposing, whereby compounds with already established safety profiles and robust supply  
83 chains are used to treat other diseases<sup>15</sup>. Since the start of the pandemic, several large-scale drug  
84 repurposing screens have been conducted<sup>16–20</sup> and have identified many different potential  
85 candidates for the treatment of COVID-19. One of the repurposed drugs, which had potent anti-  
86 SARS-CoV-2 efficacy *in vitro*, was the oral anthelmintic compound niclosamide<sup>17,20</sup>.

87 Traditionally used to treat tapeworm infection, niclosamide has been often repurposed in treating  
88 a wide range of diseases including several cancers, bacterial infections, viral infections, type 2  
89 diabetes, non-alcoholic fatty liver disease, and rheumatoid arthritis<sup>21</sup>. This range of potential uses  
90 is due to the significant polypharmacology of niclosamide, which is known to act on many  
91 different biological targets and is a modulator of the Wnt/b-catenin, mTOR and JAK/STAT3  
92 signaling pathways among others<sup>21</sup>. Niclosamide is also a weakly acidic lipophilic protonophore  
93 that can disrupt pH gradients by shuttling protons across lipid membranes<sup>22</sup> including  
94 mitochondria and lysosomes/endosomes. This physiochemical property is responsible for its  
95 activity as a mitochondrial uncoupler<sup>23</sup> and contributes to its broad activity against viruses, many  
96 of which rely on endosomal-cytoplasmic pH gradients in their life cycle<sup>24</sup>.

97 Niclosamide was also previously identified as a potential antiviral for the related coronavirus  
98 SARS-CoV, where it was shown to inhibit viral replication *in vitro* with low micromolar  
99 potency<sup>25</sup>. The mechanism of action (MOA) for niclosamide against SARS-CoV-2 may be more  
100 complex and multimodal than for SARS-CoV. Niclosamide has been shown to inhibit SARS-  
101 CoV-2 endocytosis mediated entry<sup>26</sup>, block viral replication by promoting cellular autophagy<sup>27</sup>,  
102 and disrupt spike (S) protein-mediated syncytia formation via inhibition of the host cell calcium-  
103 dependent scramblase TMEM16F<sup>28</sup>. Given the polypharmacology of niclosamide, it is likely that  
104 there are additional factors that contribute to its overall efficacy and complicate its MOA. The  
105 degree to which each of these MOAs plays a role in the antiviral efficacy of niclosamide against  
106 SARS-CoV-2 is unclear.

107 While niclosamide was clinically effective as an anthelmintic drug, it has substantial limitations  
108 for use as a COVID-19 antiviral including its low oral bioavailability (<10%) and poor water  
109 solubility<sup>29,30</sup>. Oral administration of niclosamide at 5 mg/kg in rats reaches a maximal serum  
110 concentration ( $C_{max}$ ) of only  $354 \pm 152$  ng/mL<sup>31</sup>. As a result, the concentration of niclosamide in  
111 the lungs would likely be too low to achieve therapeutic effect. Another limitation exists in that  
112 polypharmacology is generally associated with increased adverse effects for repurposed drugs<sup>32</sup>.  
113 Finally, the toxicity of niclosamide is a major concern as it has been previously repurposed as a  
114 broad anti-cancer agent and has shown significant cytotoxic/cytostatic effects *in vitro*<sup>33,34</sup>. A  
115 better understanding of the anti-SARS-CoV-2 mechanism of action for niclosamide, including  
116 potential toxicity and activity against emerging variants of concern (VOC), is needed to  
117 effectively evaluate its clinical potential.

118 The goal of this study was to expand upon the understanding of niclosamide anti-SARS-CoV-2  
119 activity and its potential as a clinical therapeutic using high content fluorescence imaging and

120 analysis. Herein, we reveal some of the mechanistic and cell morphological characteristics of  
121 niclosamide activity, including an analysis of its cellular toxicity after long-term exposure to a  
122 therapeutic antiviral dose. Additionally, we investigate niclosamide antiviral activity against  
123 SARS-CoV-2 viral VOCs. We hypothesized that because the fusogenicity amongst SARS-CoV-  
124 2 variants is known to be different<sup>35-37</sup>, the potency/efficacy of niclosamide may also vary  
125 between strains. Here we reveal the potency of niclosamide against several variants including  
126 WA1 (wildtype), B.1.1.7 (alpha), B.1.351 (beta), P.1 (gamma) and B.1.617.2 (delta). Lastly, we  
127 report the *in vitro* results of a structure-activity relationship (SAR) campaign of 33 niclosamide  
128 analogs against SARS-CoV-2 in two different cell lines (VeroE6 and H1437). We used the  
129 results from this SAR campaign to reveal additional mechanistic details for niclosamide, and aid  
130 with the identification of structural analogs with reduced cellular toxicity. Altogether, our results  
131 suggest that niclosamide itself is not a suitable candidate for the treatment of COVID-19, yet  
132 there is potential for developing analogs with improved properties for future clinical use.

## 133 **Results**

### 134 **Niclosamide has a poor selectivity index**

135 One major concern regarding the utility of niclosamide as a COVID-19 antiviral is its  
136 cytotoxicity in comparison with its antiviral efficacy. Here, we aimed to determine the selectivity  
137 index (SI) of niclosamide *in vitro* against SARS-CoV-2 in two different cell models for  
138 infection, VeroE6 and the human lung adenocarcinoma cell line H1437. To assess compound-  
139 related toxicity, we evaluated the effects of niclosamide on cells after 72 hours of compound  
140 exposure. We designed and optimized two separate high-content fluorescence imaging assays in  
141 384-well plate format using the different cell lines and measured cell viability and viral  
142 inhibition concurrently. In both assays, we used the detection of viral nucleocapsid (N) protein as

143 a direct marker for SARS-CoV-2 infection and cell count per well as an indicator of cell  
144 viability. As summarized in the **Figure 1A** workflow, VeroE6 or H1437 cells were preincubated  
145 with a 10-point 2-fold dilution series of niclosamide (N=10 replicates per condition) for 24 hours  
146 and then infected with the SARS-CoV-2 B.1.1.7 variant for an additional 48 hours post-infection  
147 (p.i.). Following infection, cells were fixed, permeabilized, and stained to identify nuclei and  
148 viral N protein. Assay plates were imaged at 10X magnification using a CX5 high content  
149 imaging platform (N=9 fields captured per well) and processed using the image segmentation  
150 and analysis software CellProfiler. Data from the CellProfiler output were used to determine  
151 percent infection and percent viability. Infection data were normalized to the average well-level  
152 % N positive for infected controls (mock) in each cell line (**Supplementary Figure S1A**).  
153 Percent viability was determined by normalizing the average well-level cell counts for the  
154 infected control (**Supplementary Figure S1B**). We found that niclosamide has potent 50%  
155 maximal inhibition ( $IC_{50}$ ) values of 564 nM for VeroE6 and 261 nM for H1437. However,  
156 niclosamide caused a 50% reduction in cell viability ( $CC_{50}$ ) at concentrations of 1050 nM and  
157 438 nM for VeroE6 and H1437, respectively, resulting in poor selectivity indices in both cell  
158 lines (1.86 for VeroE6 and 1.67 for H1437). The concentration-response curves for this  
159 experiment are shown in **Figure 1B** along with representative images for infected control, mock,  
160 and 10  $\mu$ M niclosamide conditions for each cell line. As illustrated in **Figure 2B** and  
161 **Supplementary Figure 1A**, the average percentage of N protein-positive cells in untreated  
162 infected controls after 48 hours of infection was significantly higher in VeroE6 (69 %) than  
163 H1437 (9%) indicating more efficient cell-to-cell spread in the former. In conclusion,  
164 niclosamide has a low SI in two cell lines of fibroblast origin, representing a liability for  
165 therapeutic use.

## 166 **Niclosamide potency is SARS-CoV-2 variant dependent**

167 Niclosamide has a complex polypharmacology profile against host-cell pathways, which may  
168 contribute to the antiviral efficacy and/or cytotoxicity of the compound and lead to variable  
169 responses across SARS-CoV-2 VOCs that rely differentially on these pathways. To evaluate the  
170 antiviral efficacy of niclosamide against VOCs, we used a modified infection assay in VeroE6.  
171 Exposure to niclosamide was reduced to a 1- hour preincubation and the assay window was  
172 shortened to 24 hours post-infection (**Figure 2A**) to limit compound toxicity. VeroE6 cells were  
173 used as they demonstrated a higher N-protein positivity rate than H1437 cells. We evaluated the  
174 antiviral activity of niclosamide against the WA1 (wildtype), B.1.1.7 (alpha), B.1.351 (beta), P.1  
175 (gamma), and B.1.617.2 (delta) variants in 10-point, 2-fold dilution. 10-Point dose-response  
176 efficacy experiments showed niclosamide had statistically significant differences in efficacy  
177 against VOCs, was most potent against the B.1.1.7 strain ( $IC_{50} = 298$  nM), and least potent  
178 against the WA1 strain ( $IC_{50} = 1664$  nM). The full efficacy data for all variants are shown in  
179 **Figures 2B-C**. The  $CC_{50}$  for niclosamide in this shortened assay was  $> 10$   $\mu$ M (not shown).  
180 These data demonstrate variant dependent antiviral efficacy of niclosamide.

## 181 **High-content analysis suggests inhibition of entry and syncytia formation**

182 Cell morphologic analysis of cells infected with VOCs, under the treatment of niclosamide,  
183 revealed several defining characteristics of infection influenced by compound treatment. We  
184 quantified these observations using morphological cell profiling analysis. We used data (B.1.1.7  
185 variant in VeroE6) from the viral control (mock) and three different efficacious concentrations of  
186 niclosamide around its  $IC_{50}$  (156 nM, 313 nM, 625 nM) to reanalyze using a more extensive  
187 analysis pipeline that included intensity and area/shape measurements for both nuclear and viral



188 channels. For this analysis, syncytia/individually infected cells were defined as “viral objects.”  
189 We determined that treatment with niclosamide decreased the maximum size of syncytia (**Figure**  
190 **3A**) consistent with an inhibition of cell-to-cell spread. We also found that treatment reduced the  
191 number of individually infected cells within a well (**Figure 3B**) consistent with an inhibition of  
192 viral entry. Finally, we found that the N protein intensity of remaining viral objects increased  
193 with escalating concentrations of niclosamide (**Figure 3C**). The combination of these  
194 observations suggests multiple MOA including inhibition of viral entry and cell-to-cell spread  
195 resulting in fewer infected cells with dramatically increased cellular viral N protein content.  
196 These results provide support for the polypharmacology of niclosamide that contributes to  
197 multimodal efficacy against SARS-CoV-2. In addition, these results suggest that niclosamide  
198 may not directly inhibit viral replication *in vitro*.

### 199 **Structure-activity relationship of niclosamide analogs versus SARS-CoV-2 infection**

200 Efficacy and cytotoxicity of 33 previously designed analogs<sup>38</sup> of niclosamide were used to  
201 establish a preliminary structure-activity relationship (SAR) profile for niclosamide for anti-  
202 SARS-CoV-2 activity in VeroE6 and H1437 cell lines. These analogs were also salicylanilides  
203 and had substituent modifications on the nitroaniline and/or chlorosalicyl rings (**Figure 4A**)  
204 intending to improve the selectivity while maintaining antiviral efficacy. Analog structures are  
205 shown in **Supplementary Figure S2**. Analogs were evaluated using the assay described in  
206 **Figure 1A**. All analogs were tested in 10-point 2-fold dilution series (N=3) from a starting  
207 concentration of 20  $\mu$ M. VeroE6 analog screening was performed using the B.1.1.7 variant at an  
208 MOI of 0.1, while H1437 screening was performed using the WA1 variant at an MOI of 1. The  
209 results from compound testing are summarized in **Table 1**, which includes IC<sub>50</sub> and CC<sub>50</sub> values  
210 for both cell lines. As shown in Table 1, we found that 14 analogs retained IC<sub>50</sub> values in the

211 nanomolar or micromolar range in VeroE6, while seven (compounds 2, 3, 4, 11, 12, 24, 34) were  
212 efficacious in both VeroE6 and H1437. Four compounds (2, 7, 11, 24) showed improved potency  
213 and reduced cytotoxicity against VeroE6 compared to niclosamide (**Figure 4C-F**). Overall,  
214 improvements in cytotoxicity were less pronounced against H1437. Notably, the variant  
215 dependent potency difference was conserved in H1437 cells and was significantly less potent  
216 against WA1 ( $IC_{50} = 16770$  nM) than B.1.1.7 ( $IC_{50} = 261$  nM), consistent with results in VeroE6  
217 cells.

218 In general, we found that the replacement of the nitro group on the nitroaniline ring was well  
219 tolerated (compounds 5, 6, 7, 10, 24 and 34) and improved the selectivity index. We also noted  
220 that modification to the chloro position on the salicylic acid ring (R2) was well tolerated and all  
221 compounds with only this modification retained antiviral efficacy (compounds 2, 3, 4, 11, 12).  
222 Many analogs (compounds 7,8, 10, 14-19, 22, 25, 28-30, and 33) were found to exacerbate  
223 infection in H1437 cells (**Supplementary Figure S3**) and showed inverted concentration-  
224 response curves at high concentrations. Remarkably, the removal of the hydroxyl group (R1) on  
225 the salicylic acid ring (compound 9) resulted in a complete loss of activity in both VeroE6 and  
226 H1437 (**Figure 5A**). This hydroxyl group has been previously reported as the protonophore  
227 responsible for the mitochondrial uncoupling activity of niclosamide<sup>23,38</sup>.

228 Given the drastic loss of activity, we evaluated the anti-SARS-CoV-2 efficacy of other  
229 protonophore mitochondrial uncouplers including FCCP<sup>39</sup>, 2,4 DNP<sup>40</sup>, oxyclozanide<sup>41</sup> and  
230 dicumarol<sup>42</sup>. These compounds were evaluated against WA1 and B.1.1.7 variants in VeroE6 cells  
231 using the 24-hour infection conditions described in **Figure 3A**. Both FCCP and oxyclozanide  
232 showed efficacy in the micromolar range (**Figure 5B-F**). The potency of these compounds was  
233 higher against B.1.1.7 than WA1, however the difference was more pronounced for niclosamide.

234 These results indicate that the mechanism of action for niclosamide against SARS-CoV-2 is at  
235 least partially due to its physiochemical property as a protonophore, implicating energetic stress  
236 response pathways in SARS-CoV-2 infection.

## 237 **Discussion**

238 There remains an urgent need for COVID-19 therapeutics, which can be used to prevent or treat  
239 the spread of the virus SARS-CoV-2. The FDA approved oral anthelmintic drug niclosamide has  
240 antiviral activity against SARS-CoV-2 infection *in vitro* and *in vivo*<sup>43</sup>, which has generated  
241 interest in its application for the treatment of COVID-19 and resulted in the conductance of  
242 several human clinical trials. However, given its high cytotoxicity, unknown efficacy against  
243 SARS-CoV-2 variants, low systemic bioavailability, and significant polypharmacology, we were  
244 hesitant to consider niclosamide as a promising antiviral option. In this study, we used high-  
245 content imaging of SARS-CoV-2 infected cells to evaluate some of the limitations of  
246 niclosamide as a COVID-19 antiviral. We also extended our studies to structural analogs of  
247 niclosamide, intending to reveal a preliminary structure-activity relationship profile that could be  
248 used for future compound development.

249 Niclosamide has potent cytotoxic/cytostatic effects when applied directly to cells *in vitro*<sup>34</sup>,  
250 suggesting that it may have high acute toxicity *in vivo* with increased systemic exposure.

251 Clinically, the cytotoxicity is limited by the poor bioavailability of niclosamide, which has low  
252 systemic exposure. To evaluate niclosamide toxicity, we used high-content fluorescence imaging  
253 to determine a selectivity index for niclosamide in two different cell models including VeroE6  
254 and the more physiologically relevant human lung adenocarcinoma cell line H1437. We found  
255 that niclosamide has a very poor selectivity index in both cell lines (SI <2) after 72 hours of  
256 compound exposure, suggesting that it would likely have a small therapeutic window clinically

257 even if the compound exposure was high enough in the lungs for antiviral efficacy. Longer  
258 durations of exposure to niclosamide at relevant antiviral concentrations are likely to cause  
259 significant side effects, which limits clinical application. Further studies are needed to evaluate  
260 the safety of niclosamide at antiviral concentrations *in vivo*.

261 Our results are consistent with the results from recent clinical studies of niclosamide. Since it  
262 was identified as an anti-SARS-CoV-2 agent *in vitro*, there have been several clinical studies to  
263 evaluate the antiviral efficacy and safety of niclosamide. Notably, a recent phase 2 clinical trial  
264 using 2g of orally administered niclosamide for 7 days revealed no statistically significant effect  
265 on the duration of the contagious period of SARS-CoV-2<sup>44</sup>. While niclosamide was well  
266 tolerated in this trial, the low efficacy and low adverse event rate are likely because the systemic  
267 exposure is lower than what is required to observe antiviral activity or compound-related  
268 toxicity. To address the poor oral bioavailability, several different formulations have been  
269 developed for niclosamide to improve its exposure to the necessary site of action<sup>45,46</sup>. This has  
270 included a formulation as an inhalable/intranasal powder to increase compound exposure in the  
271 lungs. Unfortunately, a recent phase-1 safety trial using 50 mg over 2.5 days of  
272 inhalable/intranasal niclosamide revealed moderate lung irritation in 59% of participants, which  
273 suggests compound-related toxicity may be playing a significant role at higher local  
274 concentrations in the lungs<sup>47</sup>. Although niclosamide is generally well-tolerated when used as an  
275 anthelmintic drug, this is because it has low bioavailability, poor solubility, and stays within the  
276 GI tract with very low systemic exposure.

277 A further limitation for using niclosamide as a COVID-19 therapeutic is its unknown efficacy  
278 against the different emerging SARS-CoV-2 VOCs. We determined the efficacy for niclosamide  
279 against the WA1 (wildtype), B.1.1.7 (alpha), B.1.351 (beta), P.1 (gamma) and B.1.617.2 (delta)

280 variants in VeroE6 cells. We found that there were significant differences in potency ranging  
281 from 298 nM (beta variant) to 1664 nM (wildtype). Interestingly, the trend in potency correlates  
282 with the ACE2 binding affinity for the different variants<sup>48</sup>. Variants, including alpha and beta,  
283 also have higher fusogenicity than the wildtype variant and are more likely to undergo cell-to-  
284 cell spread by syncytia<sup>35</sup>, which may help explain the differences in potency.

285 These results are in contrast with those reported by Weiss *et al.*, which showed no significant  
286 difference in potency amongst variants<sup>49</sup>. However, their study used qRT-PCR of viral RNA to  
287 determine IC<sub>50</sub> values, which is far less sensitive than a high-content imaging approach and does  
288 not provide information on the clinically relevant endpoint of cell-to-cell spread inhibition.  
289 Given the differences in potency amongst SARS-CoV-2 variants of concern, there arises a  
290 concern for the rapid development or selection of resistant strains that do not respond to  
291 niclosamide treatment. While the emergence of drug resistance is possible for any mechanism of  
292 action inhibiting SARS-CoV-2, the pronounced difference between niclosamide's efficacy  
293 amongst the VOCs makes niclosamide resistance inexorable. Further studies to understand the  
294 mechanistic differences underlying variant-dependent responses to drugs like niclosamide may  
295 ultimately inform *de novo* drug development for COVID-19.

296 To understand the MOA, we used morphological profiling of B.1.1.7 infected VeroE6 cells to  
297 evaluate the effect of niclosamide treatment on SARS-CoV-2 infection. We found that  
298 niclosamide inhibits the spread of virus to adjacent cells in a concentration-dependent fashion as  
299 indicated by the reduction in size of viral syncytia. We also observed that the total number of  
300 viral objects (individually infected cells or syncytia) decreased with niclosamide treatment,  
301 which is consistent with entry inhibition. For example, if niclosamide were only influencing cell-  
302 to-cell spread, the total number of viral objects would remain constant and only the size of the

303 syncytia would be affected. While the complete mechanism of action for niclosamide is  
304 complex, our results suggest that both inhibition of cell-to-cell spread and entry inhibition play a  
305 role in its activity (**Figure 6**). The degree to which each of the MOAs contributes to efficacy may  
306 be different for SARS-CoV-2 variants, which could help explain the differences in potency.

307 The polypharmacology of niclosamide is a major issue for its utility as a COVID-19 antiviral.  
308 Niclosamide is known to influence many different signal transduction pathways and has been  
309 implicated in the treatment of a wide range of diseases including several cancers, bacterial  
310 infections, viral infections, type 2 diabetes, non-alcoholic fatty liver disease, rheumatoid arthritis,  
311 and others. Unfortunately, the mechanism of action for niclosamide remains elusive for the  
312 majority of its biological effects. It is often unclear if there is a direct interaction between  
313 niclosamide and a molecular target, or if there is an indirect mechanism of action at play<sup>21</sup>. An  
314 underlying mechanism for its broad activity may be its ability to act as a protonophore, which  
315 has many different downstream effects in cells including disruption of pH gradients,  
316 mitochondrial uncoupling, and transcriptional modulation of various gene targets<sup>21</sup>. This  
317 mechanistic ambiguity also translates to its antiviral efficacy. It is likely that the antiviral  
318 activities of niclosamide (e.g., inhibition of entry, replication, and syncytia formation) are all  
319 downstream consequences of its activity as a nonspecific protonophore since activity was lost  
320 following removal of the hydroxyl group. If this is the case, then it may be challenging to  
321 separate the undesired off-target effects from the antiviral effects. While our studies suggest that  
322 niclosamide and other mitochondrial uncouplers demonstrate anti-SARS-CoV-2 efficacy, further  
323 studies are warranted to determine if these mechanisms of action are unified by protonophore  
324 activity.

325 While niclosamide is not an ideal candidate itself, it may represent a promising chemical tool for  
326 the development of more specific SARS-CoV-2 inhibitors. In particular, inhibition of cell-to-cell  
327 spread by syncytia is an extremely attractive mechanism for inhibition. Syncytia, which are  
328 multinucleated bodies resulting from the fusion of adjacent cells, are a key characteristic of  
329 SARS-CoV-2 infection and have been observed in many post-mortem histological samples from  
330 fatal COVID-19 cases<sup>28,50</sup>. Syncytia formation facilitates the rapid spread of the viral genome  
331 between cells<sup>51</sup>, which increases the area of infected tissue and may enhance immune system  
332 evasion<sup>52</sup>. An inhibitor of cell-to-cell infection like niclosamide may be clinically useful for the  
333 treatment or prevention of COVID-19, especially when cocktailed with other direct acting  
334 antivirals.

335 In this study, we also tested the antiviral efficacy of 33 structural analogs of niclosamide to  
336 establish a preliminary structure-activity relationship profile which could aid in the development  
337 of compounds with antiviral efficacy and less off-target effects. We identified seven compounds  
338 (compounds 2, 3, 4, 11, 12, 24, 34) that were efficacious in both VeroE6 and H1437 cell models  
339 and four of which had improved potency and reduced cytotoxicity in VeroE6 (Compounds  
340 2,7,11 and 24). Consequently, we believe there is a potential for designing better niclosamide  
341 analogs with improved properties. Additionally, our structure-activity analysis revealed some  
342 mechanistic features of niclosamide. Most noteworthy, the removal of the protonophore  
343 hydroxyl group resulted in complete loss of activity in both cell models. The efficacy of analogs  
344 strongly relied on their weakly acidic and lipophilic nature. Analogs with higher predicted  
345 acidity (pKa) due to the presence of carboxylic acid substituents were generally completely  
346 inactive. We also determined that other protonophores, including FCCP and oxyclozanide, also  
347 had anti-SARS-CoV-2 efficacy, suggesting that the ability to disrupt pH gradients is central to

348 the mechanism of action for niclosamide. Niclosamide has been shown to neutralize endo-  
349 lysosomal pH gradients, which is believed to be responsible for its broad-spectrum antiviral  
350 activity<sup>24</sup>. Our results indicate that this nonspecific mechanism of action also significantly  
351 contributes to the activity of niclosamide against SARS-CoV-2.

352 Overall, the poor selectivity index, low bioavailability, complex polypharmacology, nonspecific  
353 protonophore activity, and variant-dependent potency of niclosamide limit its potential as a  
354 COVID-19 therapeutic. However, our studies have shown that changes to the salicyl and aniline  
355 rings can modulate selectivity and bioavailability while maintaining its activity. Therefore,  
356 niclosamide represents a useful chemical probe that can be leveraged in a large-scale SAR  
357 campaign to design better analogs in the future.

## 358 **Methods**

### 359 **Compounds**

360 Niclosamide, FCCP, 2,4 DNP, Oxyclozanide and Dicumarol were obtained from Sigma Aldrich  
361 and prepared as 10 mM stock solutions in dimethylsulfoxide (DMSO). The 33 structural analogs  
362 of niclosamide were obtained from previous studies<sup>38</sup>. Compounds were solubilized at 10 mM in  
363 DMSO, and were dispensed onto cells using an HPD300e digital compound dispenser.

### 364 **Cells and Virus**

365 VeroE6 cells were maintained in Dulbecco's Modified Eagle Medium (DMEM), and H1437 cells  
366 were maintained in RPMI 1640 base medium. Both cell lines were supplemented with 10% fetal  
367 bovine serum (FBS) and 1X pen-strep solution and were grown at 37°C with 5% CO<sub>2</sub> following  
368 standard cell culture procedures. These cell lines were tested for mycoplasma contamination



369 before use and were negative. The following reagents were deposited by the Centers for Disease  
370 Control and Prevention and were obtained through BEI resources, NIAID, NIH: SARS-Related  
371 Coronavirus 2, Isolate USA-WA1/2020, NR-52281, USA/CA\_CDC\_5574/2020 (B.1.1.7), NR-  
372 54011, USA/MD-HP01542/2021 (Lineage B.1.351), NR-55282, Japan/TY7-503/2021 (Brazil  
373 P.1), NR-54982, USA/PHC658/2021 (Lineage B.1.617.2), NR-55611. Viral stocks were grown in  
374 VeroE6 and titers were determined by TCID<sub>50</sub> using the Reed and Muench method<sup>53</sup>. All the  
375 work with live SARS-CoV-2 virus was performed in biosafety level-3 containment lab (BSL3)  
376 with the approval of the University of Michigan's Department of Environment and Health and  
377 Safety and the Institutional Biosafety Committee.

#### 378 **Anti-SARS-CoV-2 high content bioassays**

379 Assays were adapted from previous work and optimized for H1437 and VeroE6 cell lines<sup>17,54</sup>.  
380 For 48-hour infection experiments, VeroE6 and H1437 cells were seeded onto 384 well plates  
381 (6057300, Perkin Elmer) at densities of 3000 and 5000 cells per well, respectively, in 50  $\mu$ L of  
382 media. After 24 hours of cell attachment at 37°C and 5% CO<sub>2</sub>, compounds were dispensed  
383 directly to the cell plates using an HPD300e digital compound dispenser. All wells were  
384 normalized to a constant DMSO concentration of 0.2%, and plates contained both infected and  
385 uninfected control wells. After 24 hours of preincubation with compounds, cells were inoculated  
386 with the indicated SARS-CoV-2 variant at MOIs of 0.1 for VeroE6 and 1 for H1437. Cells were  
387 incubated with virus and compounds for an additional 48 hours and then fixed with 4%  
388 paraformaldehyde for 30 minutes at room temperature. Cells were then permeabilized with 0.3%  
389 Triton-X100 for 15 minutes and stained with anti-nucleocapsid protein primary antibody  
390 (ABIN6952432, Antibodies Online) at a dilution of 1:2000 overnight at +4°C. Following  
391 primary antibody staining, cells were stained with a dye cocktail containing 1:1000 secondary

392 antibody Alexa-647 (goat anti-mouse, A21235, Thermo Fisher) and 10  $\mu\text{g}/\text{mL}$  Hoechst 33342  
393 pentahydrate (bis-benzimide) for nuclear labeling for a total of 30 minutes at room temperature.  
394 Cells were stored in PBS before imaging. For 24-hour infection experiments, the methods were  
395 comparable except that VeroE6 cells were seeded at 5000 cells per well, compounds were  
396 preincubated for 1 hour instead of 24, and the infection window was 24 hours instead of 48. All  
397 other inoculation, fixation and staining procedures were identical.

### 398 **High Content Imaging**

399 Stained assay plates were imaged using a both a Thermo Fisher CX5 with a 10X/0.45NA  
400 objective lens and a Yokogawa Cell Voyager 8000 (CV8000) microscope with a 20X/1.0NA  
401 water immersion lens. Imaging techniques were followed as described previously for detection  
402 of nuclei and SARS-CoV-2 nucleocapsid protein<sup>17,54</sup>. A total of N=9 fields per well were imaged  
403 for all assay plates, accounting for roughly 80% of the total well area.

### 404 **Image Processing**

405 Images were processed using the image segmentation and analysis software CellProfiler 4.0<sup>55</sup>.  
406 Separate pipelines were developed for H1437 and VeroE6 images. Pipelines were used to  
407 identify nuclei (Hoechst 33342) and viral objects including multinucleated syncytia and  
408 individually infected cells (Alexa Fluor 647) by adaptive otsu thresholding. Similar to previous  
409 work, infected cells were identified using the *relateobjects* module whereby any nucleus  
410 contained within a viral object was defined as infected<sup>54</sup>. For morphological profiling of B.1.1.7  
411 infection vs. niclosamide in VeroE6, additional intensity, textural and spatial features were  
412 measured using CellProfiler 4.0 for both the nuclear and viral channels.

413

414

#### 415 **Concentration response analysis and IC<sub>50</sub>/CC<sub>50</sub> determination**

416 Field level data were grouped at the well level using Knime<sup>56</sup> and used to determine normalized  
417 percent infection and percent viability scores. Raw percent infection per well was determined by  
418 taking the ratio of infected nuclei to total nuclei and multiplying by 100. Normalized percent  
419 infection was then generated such that “100% infection” was equivalent to the average raw  
420 percent infection of the viral control for each plate. Cell counts for the entire plate were  
421 normalized and 100% viability was based on the average cell count of the infected DMSO  
422 control wells. Concentration-response curves were plotted in GraphPad Prism 9.0 (GraphPad  
423 Software) and fitted using a semi-log 4-parameter variable slope model. IC<sub>50</sub> and CC<sub>50</sub> values were  
424 extracted from percent infection curves and percent viability curves, respectively. Selectivity  
425 indices were determined by taking a ratio of the CC<sub>50</sub> and IC<sub>50</sub>.

#### 426 **High content imaging analysis of B.1.1.7 infection versus niclosamide**

427 Object level data for nuclei and viral objects (syncytia and individually infected cells) was used  
428 to evaluate morphological and phenotypic features of B.1.1.7 infection versus niclosamide  
429 including changes in N protein intensity and area of viral objects. Only images for the infected  
430 DMSO vehicle control, as well as 3 different concentrations of niclosamide (156 nM, 313 nM  
431 and 625 nM) were included in this analysis. The max viral object area reported in Figure 3A  
432 represents the largest viral object observed for each condition including all fields and replicate  
433 wells. The mean N protein intensity for infected cells was computed at the object level and the  
434 results from Figure 3C include data for cells in each condition.

435

436

437

438

### 439 **Statistical analysis and hypothesis testing**

440 All statistical analyses and hypothesis testing was performed using GraphPad Prism 9.0

441 (GraphPad software). Specifics for statistical analyses, including sample sizes and other

442 important data are included within the text of figure legends.

### 443 **Acknowledgements**

444 We acknowledge funding from the University of Michigan Institute for Clinical and Health

445 Research (MICHR; National Center for Advancing Translational Science Grant UL1TR002240)

446 and the U-M Center for Drug Repurposing. JZS is supported by the National Institute of

447 Diabetes and Kidney Diseases (R01DK120623). CEW is supported in part by The University of

448 Michigan Biological Scholars Science Program. JWW is supported by an American Foundation

449 for Pharmaceutical Education (AFPE) regional award. CM is supported by European funding

450 MSCA actions, GA481247. SRM is supported by a pharmacological sciences training program

451 (PSTP) T32 training grant. We thank Tracey Schultz for thoughtful discussions and assistance

452 with cell culture. Figures were generated using Biorender.com. The authors declare no conflicts

453 of interest.

### 454 **References**

455 1. Hu, B., Guo, H., Zhou, P. & Shi, Z. L. Characteristics of SARS-CoV-2 and COVID-19. *Nature Reviews*  
456 *Microbiology* 2020 19:3 19, 141–154 (2020).

457 2. Aslan, A., Aslan, C., Zolbanin, N. M. & Jafari, R. Acute respiratory distress syndrome in COVID-19:  
458 possible mechanisms and therapeutic management. *Pneumonia* 2021 13:1 13, 1–15 (2021).

459 3. Mizrahi, B. *et al.* Longitudinal symptom dynamics of COVID-19 infection. *Nature Communications*  
460 2020 11:1 11, 1–10 (2020).

461 4. Dong, E., Du, H. & Gardner, L. An interactive web-based dashboard to track COVID-19 in real  
462 time. *Lancet Infect Dis* 20, 533–534 (2020).

463 5. Harvey, W. T. *et al.* SARS-CoV-2 variants, spike mutations and immune escape. *Nat Rev Microbiol*  
464 19, 409–424 (2021).

- 465 6. Kyriakidis, N. C., López-Cortés, A., González, E. V., Grimaldos, A. B. & Prado, E. O. SARS-CoV-2  
466 vaccines strategies: a comprehensive review of phase 3 candidates. *npj Vaccines* 2021 6:1 6, 1–17  
467 (2021).
- 468 7. Cully, M. A tale of two antiviral targets - and the COVID-19 drugs that bind them. *Nat Rev Drug*  
469 *Discov* 21, 3–5 (2022).
- 470 8. Whitley, R. Molnupiravir — A Step toward Orally Bioavailable Therapies for Covid-19. *New*  
471 *England Journal of Medicine* 386, 592–593 (2022).
- 472 9. Hammond, J. *et al.* Oral Nirmatrelvir for High-Risk, Nonhospitalized Adults with Covid-19. *New*  
473 *England Journal of Medicine* 386, 1397–1408 (2022).
- 474 10. Feinmann, J. Covid-19: global vaccine production is a mess and shortages are down to more than  
475 just hoarding. *BMJ* 375, (2021).
- 476 11. Qomara, W. F., Pramanisa, D. N., Amalia, S. H., Purwadi, F. v. & Zakiyah, N. Effectiveness of  
477 Remdesivir, Lopinavir/Ritonavir, and Favipiravir for COVID-19 Treatment: A Systematic Review.  
478 *Int J Gen Med* 14, 8557–8571 (2021).
- 479 12. Gottlieb, R. L. *et al.* Early Remdesivir to Prevent Progression to Severe Covid-19 in Outpatients. *N*  
480 *Engl J Med* 386, 305–315 (2022).
- 481 13. Chen, R. E. *et al.* Resistance of SARS-CoV-2 variants to neutralization by monoclonal and serum-  
482 derived polyclonal antibodies. *Nature Medicine* 2021 27:4 27, 717–726 (2021).
- 483 14. Takashita, E. *et al.* Efficacy of Antiviral Agents against the SARS-CoV-2 Omicron Subvariant BA.2.  
484 *New England Journal of Medicine* 386, 1475–1477 (2022).
- 485 15. Pushpakom, S. *et al.* Drug repurposing: progress, challenges and recommendations. *Nature*  
486 *Reviews Drug Discovery* 2018 18:1 18, 41–58 (2018).
- 487 16. Drayman, N. *et al.* Masitinib is a broad coronavirus 3CL inhibitor that blocks replication of SARS-  
488 CoV-2. *Science (1979)* 373, 931–936 (2021).
- 489 17. Mirabelli, C. *et al.* Morphological cell profiling of SARS-CoV-2 infection identifies drug repurposing  
490 candidates for COVID-19. *Proc Natl Acad Sci U S A* 118, (2021).
- 491 18. Touret, F. *et al.* In vitro screening of a FDA approved chemical library reveals potential inhibitors  
492 of SARS-CoV-2 replication. *Scientific Reports* 10, 13093 (2020).
- 493 19. Xiao, X. *et al.* Identification of Potent and Safe Antiviral Therapeutic Candidates Against SARS-  
494 CoV-2. *Frontiers in Immunology* 11, (2020).
- 495 20. Jeon, S. *et al.* Identification of antiviral drug candidates against SARS-CoV-2 from FDA-approved  
496 drugs. *Antimicrobial Agents and Chemotherapy* 64, (2020).
- 497 21. Chen, W., Mook, R. A., Premont, R. T. & Wang, J. Niclosamide: Beyond an antihelminthic drug.  
498 *Cellular Signalling* 41, 89–96 (2018).

- 499 22. Fonseca, B. D. *et al.* Structure-activity analysis of niclosamide reveals potential role for  
500 cytoplasmic pH in control of mammalian target of rapamycin complex 1 (mTORC1) signaling. *J*  
501 *Biol Chem* **287**, 17530–17545 (2012).
- 502 23. Kumar, R. *et al.* Mitochondrial uncoupling reveals a novel therapeutic opportunity for p53-  
503 defective cancers. *Nature Communications* **2018 9:1 9**, 1–13 (2018).
- 504 24. Jurgeit, A. *et al.* Niclosamide Is a Proton Carrier and Targets Acidic Endosomes with Broad  
505 Antiviral Effects. *PLoS Pathogens* **8**, 1002976 (2012).
- 506 25. Wu, C. J. *et al.* Inhibition of Severe Acute Respiratory Syndrome Coronavirus Replication by  
507 Niclosamide. *Antimicrobial Agents and Chemotherapy* **48**, 2693 (2004).
- 508 26. Prabhakara, C. *et al.* Strategies to target SARS-CoV-2 entry and infection using dual mechanisms  
509 of inhibition by acidification inhibitors. *PLoS Pathogens* **17**, e1009706 (2021).
- 510 27. Gassen, N. C. *et al.* SARS-CoV-2-mediated dysregulation of metabolism and autophagy uncovers  
511 host-targeting antivirals. *Nature Communications* **2021 12:1 12**, 1–15 (2021).
- 512 28. Braga, L. *et al.* Drugs that inhibit TMEM16 proteins block SARS-CoV-2 spike-induced syncytia.  
513 *Nature* **2021 594:7861 594**, 88–93 (2021).
- 514 29. Lin, C. K. *et al.* Preclinical evaluation of a nanoformulated antihelminthic, niclosamide, in ovarian  
515 cancer. *Oncotarget* **7**, 8993 (2016).
- 516 30. Fan, X., Li, H., Ding, X. & Zhang, Q. Y. Contributions of Hepatic and Intestinal Metabolism to the  
517 Disposition of Niclosamide, a Repurposed Drug with Poor Bioavailability. *Drug Metab Dispos* **47**,  
518 756–763 (2019).
- 519 31. Chang, Y. W. *et al.* Pharmacokinetics of anti-SARS-CoV agent niclosamide and its analogs in rats.  
520 *Journal of Food and Drug Analysis* **14**, 15 (2020).
- 521 32. Reddy, A. S. & Zhang, S. Polypharmacology: drug discovery for the future. *Expert Rev Clin*  
522 *Pharmacol* **6**, 41–47 (2013).
- 523 33. Wieland, A. *et al.* Anticancer effects of niclosamide in human glioblastoma. *Clin Cancer Res* **19**,  
524 4124–4136 (2013).
- 525 34. Hamdoun, S., Jung, P. & Efferth, T. Drug repurposing of the anthelmintic niclosamide to treat  
526 multidrug-resistant leukemia. *Frontiers in Pharmacology* **8**, (2017).
- 527 35. Rajah, M. M. *et al.* SARS-CoV-2 Alpha, Beta, and Delta variants display enhanced Spike-mediated  
528 syncytia formation. *EMBO J* **40**, (2021).
- 529 36. Saito, A. *et al.* Enhanced fusogenicity and pathogenicity of SARS-CoV-2 Delta P681R mutation.  
530 *Nature* **602**, 300–306 (2022).
- 531 37. Zhang, Y. *et al.* SARS-CoV-2 spike L452R mutation increases Omicron variant fusogenicity and  
532 infectivity as well as host glycolysis. *Signal Transduction and Targeted Therapy* **2022 7:1 7**, 1–3  
533 (2022).

- 534 38. Bhagat, H. A. *et al.* N-substituted phenylbenzamides of the niclosamide chemotype attenuate  
535 obesity related changes in high fat diet fed mice. *PLOS ONE* **13**, e0204605 (2018).
- 536 39. Park, K. S. *et al.* FCCP depolarizes plasma membrane potential by activating proton and Na<sup>+</sup>  
537 currents in bovine aortic endothelial cells. *Pflugers Archiv : European journal of physiology* **443**,  
538 344–352 (2002).
- 539 40. Blaikie, F. H. *et al.* Targeting dinitrophenol to mitochondria: limitations to the development of a  
540 self-limiting mitochondrial protonophore. *Biosci Rep* **26**, 231–243 (2006).
- 541 41. Shrestha, R., Johnson, E. & Byrne, F. L. Exploring the therapeutic potential of mitochondrial  
542 uncouplers in cancer. *Molecular Metabolism* **51**, 101222 (2021).
- 543 42. Kotova, E. A. & Antonenko, Y. N. Fifty Years of Research on Protonophores: Mitochondrial  
544 Uncoupling As a Basis for Therapeutic Action. *Acta Naturae* **14**, 4 (2022).
- 545 43. Blake, S. *et al.* Salicylanilides Reduce SARS-CoV-2 Replication and Suppress Induction of  
546 Inflammatory Cytokines in a Rodent Model. *ACS Infectious Diseases* **7**, 2229–2237 (2021).
- 547 44. Cairns, D. M. *et al.* Efficacy of Niclosamide vs Placebo in SARS-CoV-2 Respiratory Viral Clearance,  
548 Viral Shedding, and Duration of Symptoms Among Patients With Mild to Moderate COVID-19: A  
549 Phase 2 Randomized Clinical Trial. *JAMA Network Open* **5**, e2144942–e2144942 (2022).
- 550 45. Parikh, M. *et al.* Phase Ib trial of reformulated niclosamide with abiraterone/prednisone in men  
551 with castration-resistant prostate cancer. *Scientific Reports 2021 11:1* **11**, 1–7 (2021).
- 552 46. Lin, C. K. *et al.* Preclinical evaluation of a nanoformulated antihelminthic, niclosamide, in ovarian  
553 cancer. *Oncotarget* **7**, 8993 (2016).
- 554 47. Backer, V. *et al.* A randomized, double-blind, placebo-controlled phase 1 trial of inhaled and  
555 intranasal niclosamide: A broad spectrum antiviral candidate for treatment of COVID-19. *The*  
556 *Lancet Regional Health - Europe* **4**, 100084 (2021).
- 557 48. Liu, H., Wei, P., Kappler, J. W., Marrack, P. & Zhang, G. SARS-CoV-2 Variants of Concern and  
558 Variants of Interest Receptor Binding Domain Mutations and Virus Infectivity. *Frontiers in*  
559 *Immunology* **13**, 50 (2022).
- 560 49. Weiss, A. *et al.* Niclosamide shows strong antiviral activity in a human airway model of SARS-CoV-  
561 2 infection and a conserved potency against the Alpha (B.1.1.7), Beta (B.1.351) and Delta variant  
562 (B.1.617.2). *PLOS ONE* **16**, e0260958 (2021).
- 563 50. Bussani, R. *et al.* Persistence of viral RNA, pneumocyte syncytia and thrombosis are hallmarks of  
564 advanced COVID-19 pathology. *EBioMedicine* **61**, (2020).
- 565 51. Lin, L., Li, Q., Wang, Y. & Shi, Y. Syncytia formation during SARS-CoV-2 lung infection: a disastrous  
566 unity to eliminate lymphocytes. *Cell Death & Differentiation 2021 28:6* **28**, 2019–2021 (2021).
- 567 52. Rajah, M. M., Bernier, A., Buchrieser, J. & Schwartz, O. The Mechanism and Consequences of  
568 SARS-CoV-2 Spike-Mediated Fusion and Syncytia Formation. *Journal of Molecular Biology* **434**,  
569 167280 (2022).



- 570 53. Reed, L. J. & Muench, H. A simple method of estimating fifty per cent endpoints. *American*  
571 *Journal of Epidemiology* **27**, 493–497 (1938).
- 572 54. Wotring, J. W., Fursmidt, R., Ward, L. & Sexton, J. Z. Evaluating the in vitro efficacy of bovine  
573 lactoferrin products against SARS-CoV-2 variants of concern. *J Dairy Sci* **105**, 2791–2802 (2022).
- 574 55. McQuin, C. *et al.* CellProfiler 3.0: Next-generation image processing for biology. *PLOS Biology* **16**,  
575 e2005970 (2018).
- 576 56. Berthold, M. R. *et al.* KNIME - the Konstanz information miner. *ACM SIGKDD Explorations*  
577 *Newsletter* 58–61 (2009) doi:10.1145/1656274.1656280.

578

579

580

581

582

583

584

585

586

587

588

589

590

591

592

593

594

595

596

597

598

599



600 pageFigures

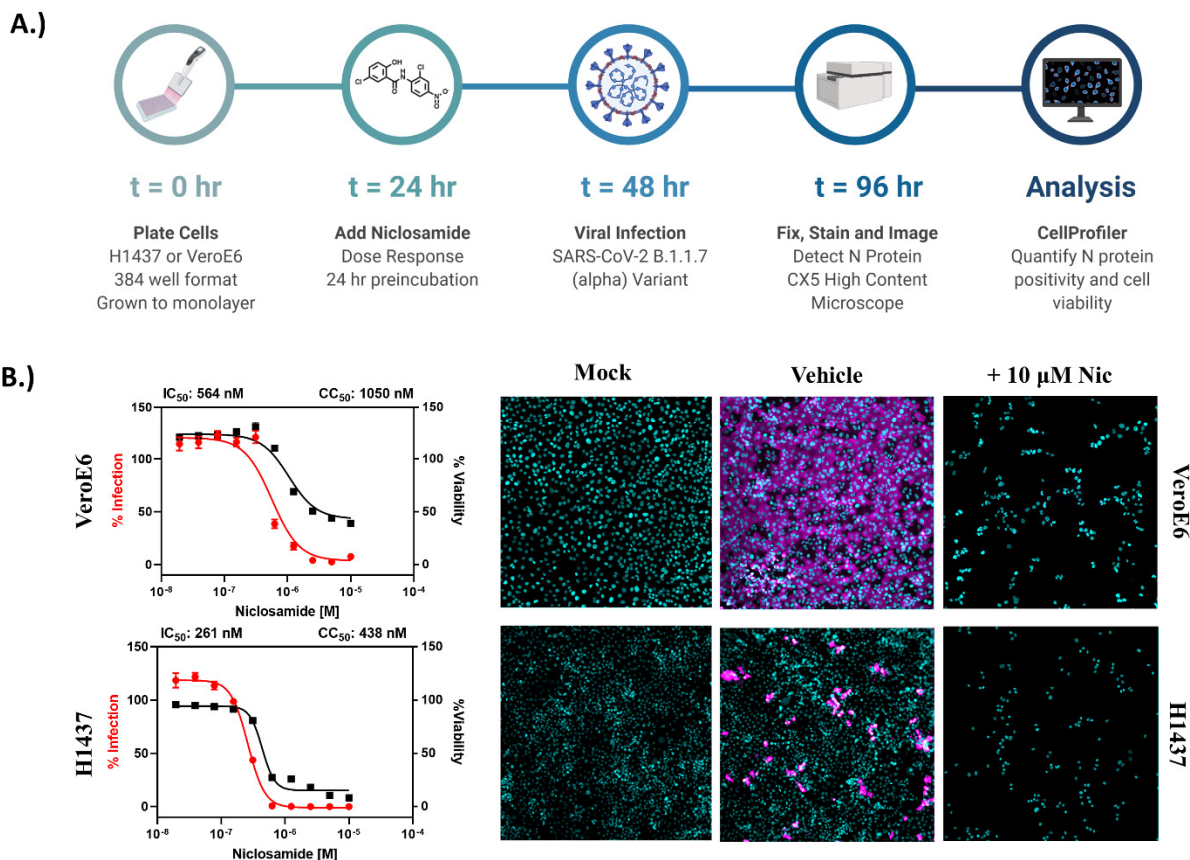

601  
602 **Figure 1. Niclosamide is toxic at antiviral concentrations after long term exposure. A.)**  
603 Workflow for high content anti-SARS-CoV-2 bioassay screening to determine infection  
604 inhibition and cytotoxicity. B.) 10-point, 2-fold dilution concentration-response curves for  
605 VeroE6 and H1437 cells with a starting concentration of 10 μM. VeroE6 cells were infected with  
606 SARS-CoV-2 B.1.1.7 variant at a multiplicity of infection (MOI) of 0.1, while H1437 were  
607 infected with SARS-CoV-2 WA1 variant at an MOI =1 to achieve optimal infection at 48 hours  
608 post-infection. Data points represent mean ± SEM for N=10 replicates per condition. Curve  
609 fitting was performed in GraphPad Prism 9.0 using a semi-log 4-parameter variable slope model.  
610 Representative overlay images for mock, vehicle, and 10 μM Niclosamide treatment (infected)  
611 are included (cyan = nuclei, magenta = SARS-CoV-2 N protein).

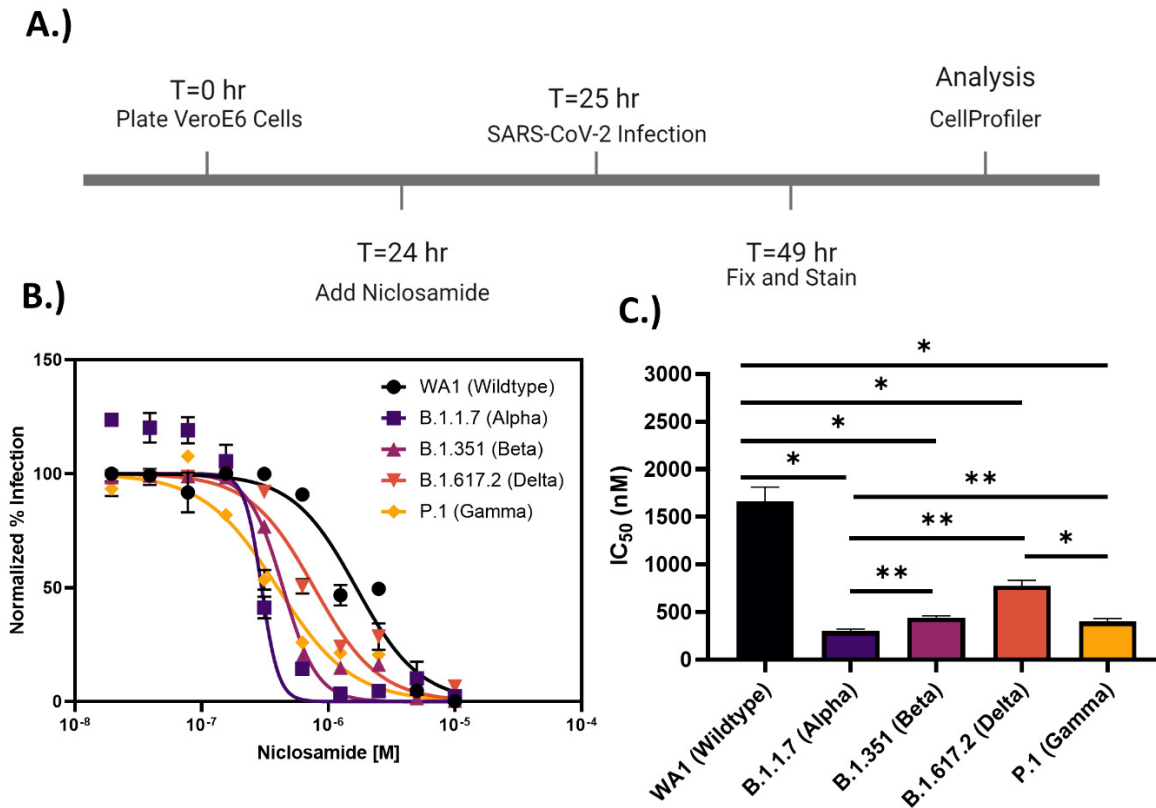

612

613 **Figure 2. Niclosamide potency is SARS-CoV-2 variant dependent.** A.) Assay timeline for  
614 24-hour infection experiment. The assay window was shortened to reduce niclosamide toxicity.  
615 B.) 10-point 2-fold concentration-response curves for niclosamide against the different SARS-  
616 CoV-2 variants of concern (MOI = 0.1 for each variant) with a top concentration of 10 $\mu$ M.  
617 Curves were fitted with GraphPad Prism 9.0 software using a semi-log 4-parameter variable  
618 slope model. Data for each variant was normalized to the average percent infected of its  
619 respective viral control. Data points represent mean  $\pm$  SEM for N=3 replicates. C.) IC<sub>50</sub> values  
620 for niclosamide potency against SARS-CoV-2 variants of concern. Values were extracted from  
621 curve fitting using GraphPad 9.0 and include SEM error bars (WA1: 1664  $\pm$  149 nM, B.1.1.7:  
622 298  $\pm$  23 nM, B.1.351: 440  $\pm$  21 nM, B.1.617.2: 774  $\pm$  58 nM, P.1: 399  $\pm$  34 nM). Significance  
623 was determined using Student's T-tests (\* = P<0.05, \*\* = P<0.01).

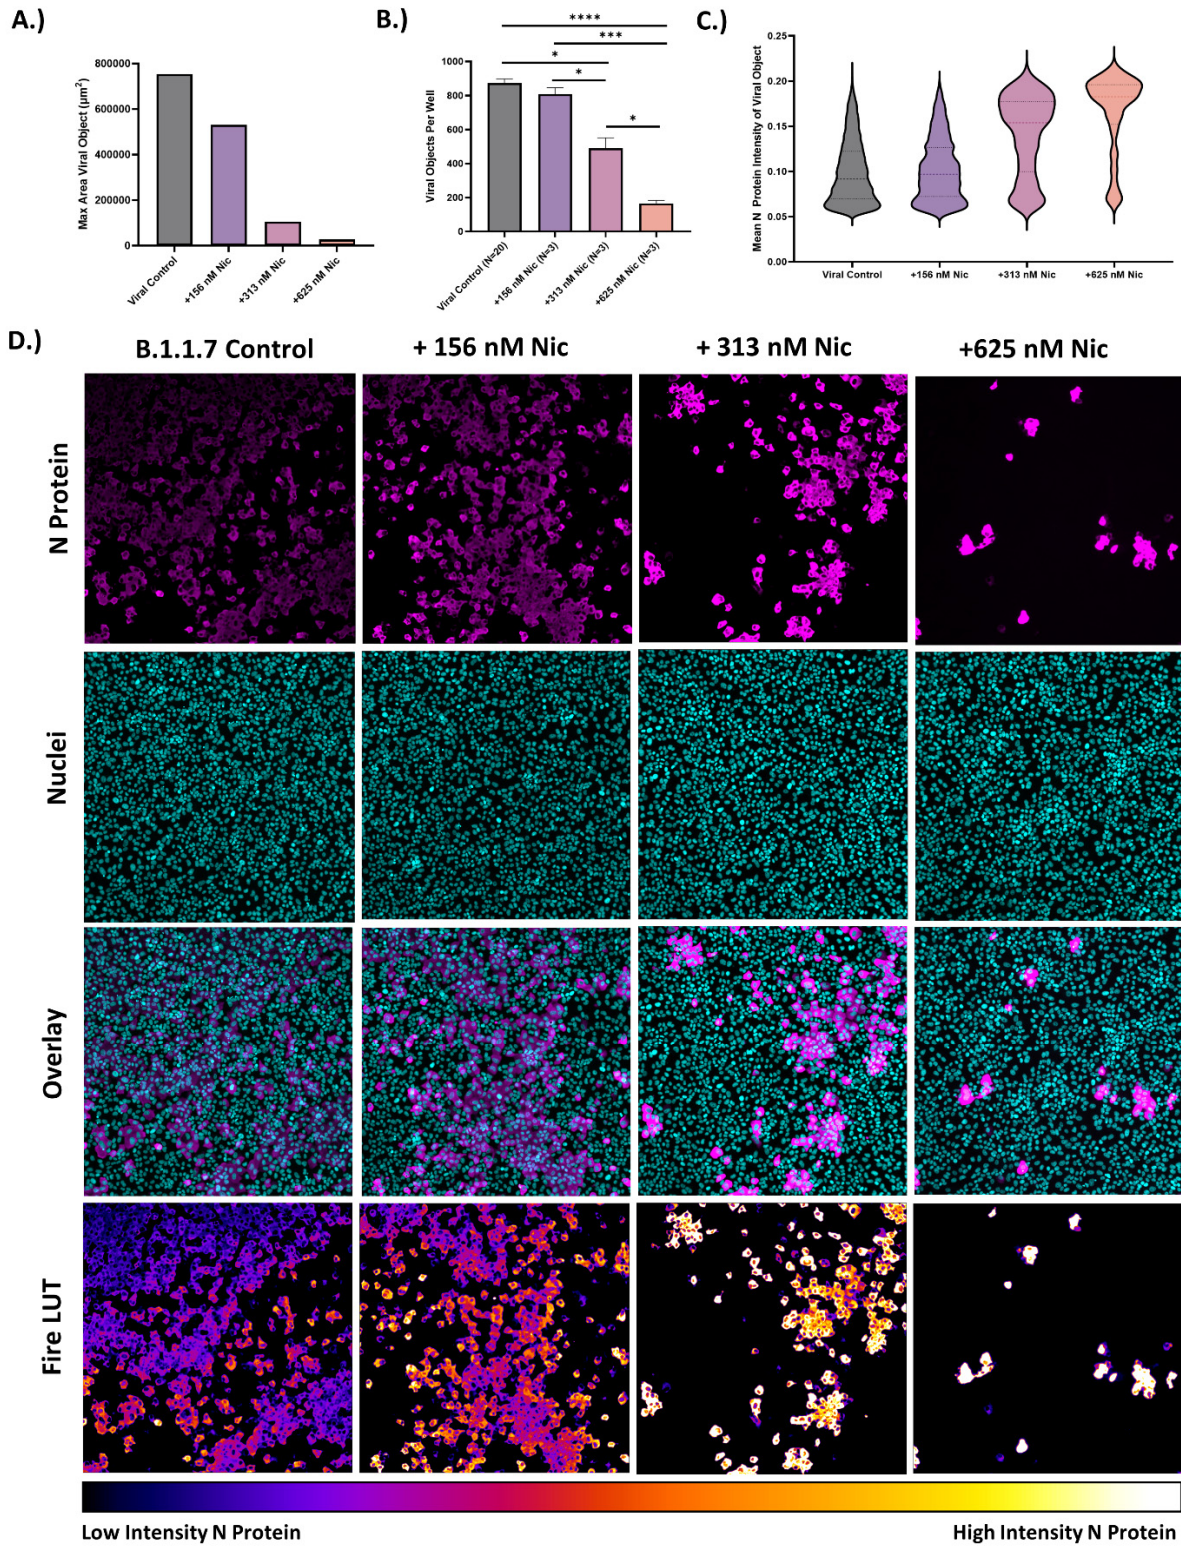

624

625



626 **Figure 3. Morphological profiling of B.1.1.7 infection versus niclosamide treatment in**  
627 **VeroE6.** Image analysis reveals mechanistic characteristics of niclosamide activity against  
628 SARS-CoV-2 infection. A.) The maximum area of viral objects decreases with increasing  
629 niclosamide concentration. Data is the max area for viral objects in each condition. Viral control:  
630 N=17452, +156 nM niclosamide: N=2425, +313 nM niclosamide: N= 1470, +625 nM  
631 niclosamide: N= 496. B.) Viral objects per well decreases with increasing niclosamide  
632 concentration. Viral objects include single infected cells and syncytia. Replicate values are  
633 indicated on the X axis. C.) Mean pixel intensity for viral objects in each condition. Pixel  
634 intensity increases with increasing niclosamide concentration. D.) Representative images for  
635 each condition including N-protein channel, nuclear channel, an overlaid image and a fire  
636 lookup table (LUT) image of the N-protein channel. Images were taken on a CX5 high content  
637 microscope at 10X magnification. \* =  $P < 0.05$ , \*\*\* =  $P < 0.001$ , \*\*\*\* =  $P < 0.0001$ .

638  
639  
640  
641  
642  
643  
644  
645  
646  
647  
648  
649  
650  
651

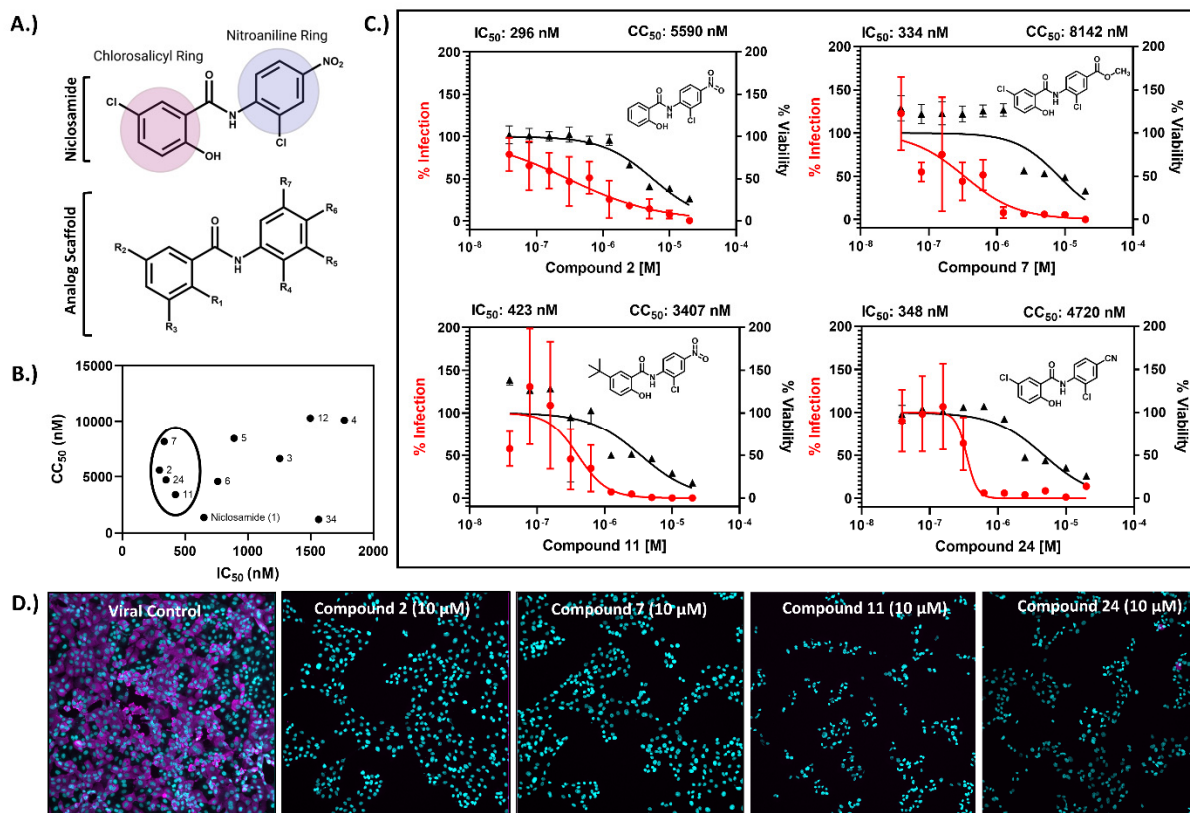

652

653 **Figure 4. Niclosamide analogs have improved efficacy and reduced cytotoxicity in VeroE6.**

654 A.) Structure of niclosamide indicating the chlorosalicyl/nitroaniline rings, and analog scaffold

655 with modified substituent positions labeled. B.) IC<sub>50</sub> vs. CC<sub>50</sub> plot highlighting efficacious

656 compounds in VeroE6. Compounds with improved potency and cytotoxicity profiles are circled

657 on the plot. C.) 10-point, 2-fold concentration-response curves for the top four niclosamide

658 analogs with a starting concentration of 20 μM. Data are shown as the mean ± SEM of N=3

659 replicate wells per condition. Curves for infection (in red) and cell viability (in black) are

660 included. D.) Representative images of infected cells treated with indicated compounds and viral

661 control (Vehicle). (10X magnification, Cyan = nuclei, magenta = SARS-CoV-2 nucleocapsid

662 protein).

663

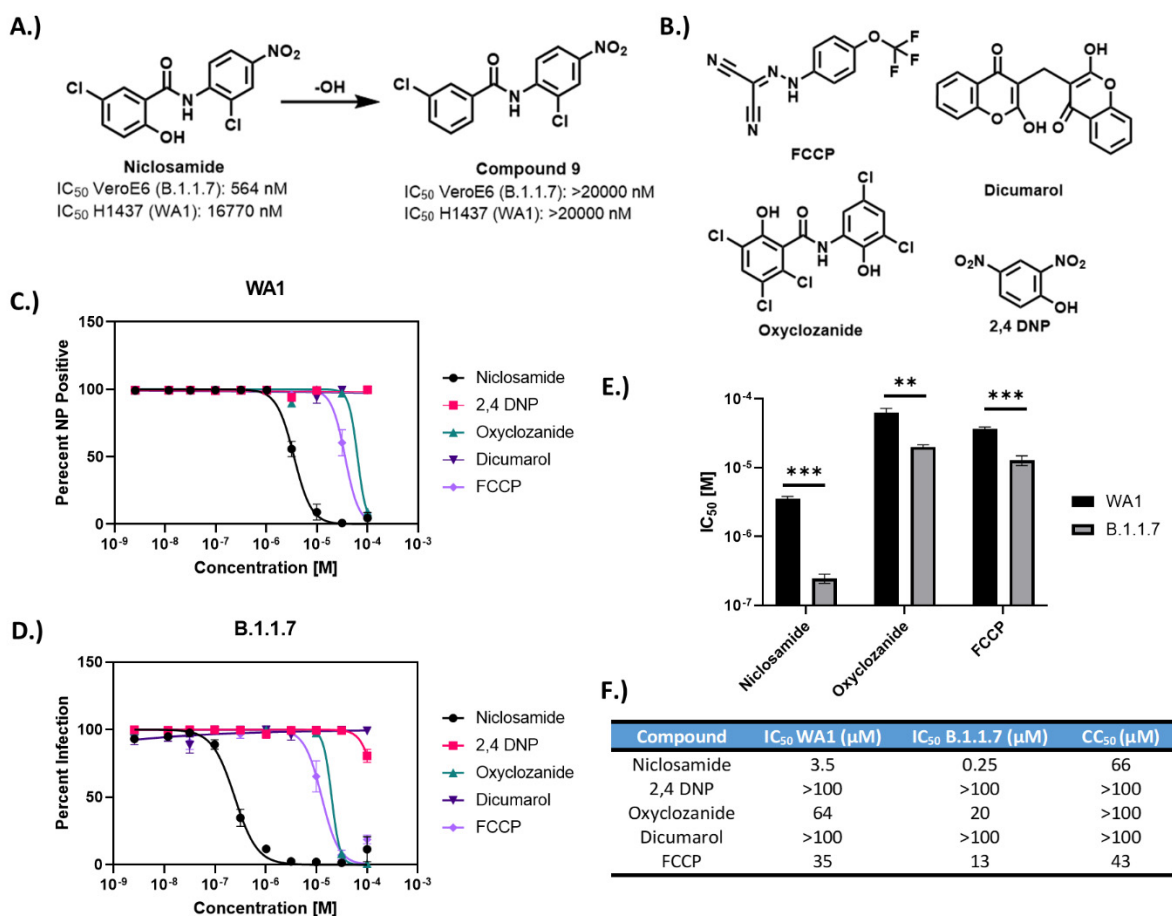

664  
 665 **Figure 5. Efficacy of protonophores against SARS-CoV-2.** A.) Removal of protonophore  
 666 hydroxyl of niclosamide results in a complete loss of efficacy in both VeroE6 and H1437 cells.  
 667 B.) Chemical structures for other protonophores evaluated against SARS-CoV-2 infection. C-D.)  
 668 10-point, 2-fold concentration response curves for protonophores versus WA1 variant (C.) and  
 669 B.1.1.7 variant (D.) with starting concentrations of 100  $\mu$ M. E.)  $IC_{50}$  plot for antiviral  
 670 protonophores indicating significantly different potency against variants. F.) Table of  $IC_{50}$  and  
 671  $CC_{50}$  values for protonophores.

672  
 673

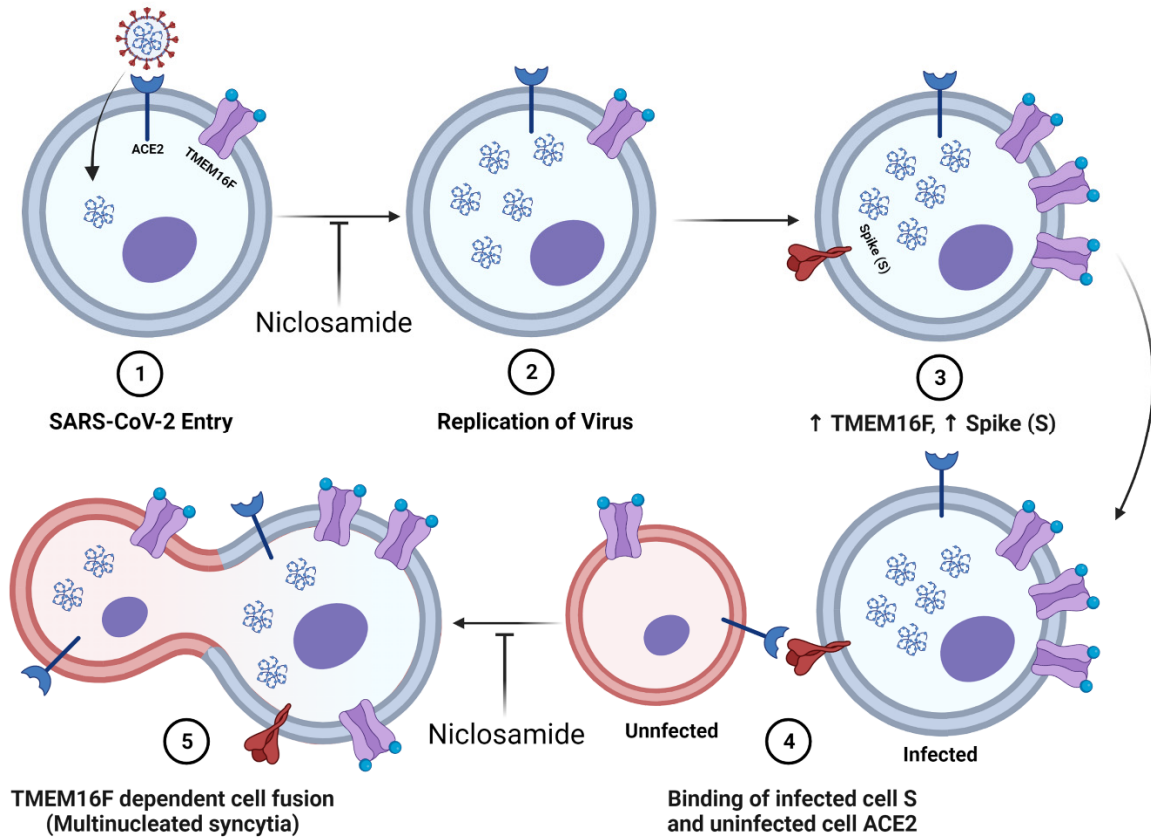

674

675 **Figure 6.** Diagram of niclosamides effect on SARS-CoV-2 entry and spike protein-mediated

676 syncytia formation. 1.) SARS-CoV-2 binds to the ACE2 receptor of the host cell and enters.

677 Niclosamide has been shown to inhibit this entry step *in vitro* 2.) Viral replication generates

678 many copies of the RNA genome. 3.) Infection results in an increased expression of viral spike

679 (S) protein and host cell TMEM16F at the plasma membrane. 4.) The S protein at the surface on

680 an infected cell binds to the ACE2 receptor of an adjacent uninfected cell. 5.) Spike-dependent

681 syncytia formation is mediated by the calcium-dependent lipid scramblase TMEM16F to

682 generate multinucleated infected cell bodies. Niclosamide, an inhibitor of TMEM16F, has been

683 shown to block spike-dependent syncytia formation.

684

685

686 **Tables**

687 **Table 1. SAR table for Niclosamide Analogs.** IC<sub>50</sub> and CC<sub>50</sub> values for VeroE6 (SARS-CoV-2  
 688 B.1.1.7 variant) and H1437 (SARS-CoV-2 WA1 variant). Physical properties including cLogP,  
 689 pKa and logS were calculated using MOE and included in the table for each compound.  
 690 Compounds that have efficacy against both cell lines are highlighted in gray.

| Compound #      | R1 | R2               | R3   | R4              | R5              | R6                                | R7   | Vero-E6 (B.1.1.7)     |                       | H1437 (WA1)           |                       | cLogP | pKa  | logS  |
|-----------------|----|------------------|------|-----------------|-----------------|-----------------------------------|------|-----------------------|-----------------------|-----------------------|-----------------------|-------|------|-------|
|                 |    |                  |      |                 |                 |                                   |      | IC <sub>50</sub> (nM) | CC <sub>50</sub> (nM) | IC <sub>50</sub> (nM) | CC <sub>50</sub> (nM) |       |      |       |
| 1 (Niclosamide) | OH | Cl               | H    | Cl              | H               | NO <sub>2</sub>                   | H    | 564                   | 1050                  | 16770                 | 17060                 | 4.17  | 7.98 | -5.00 |
| 2               | OH | H                | H    | Cl              | H               | NO <sub>2</sub>                   | H    | 296                   | 5590                  | 4915                  | 8403                  | 3.47  | 7.52 | -4.32 |
| 3               | OH | CH <sub>3</sub>  | H    | Cl              | H               | NO <sub>2</sub>                   | H    | 1254                  | 6277                  | 2595                  | 3056                  | 3.97  | 7.52 | -4.66 |
| 4               | OH | OCH <sub>3</sub> | H    | Cl              | H               | NO <sub>2</sub>                   | H    | 1769                  | 10110                 | 10880                 | 8941                  | 3.39  | 7.65 | -4.39 |
| 5               | OH | Cl               | H    | Cl              | H               | H                                 | H    | 890                   | 8435                  | >20000                | 18570                 | 4.17  | 8.01 | -4.54 |
| 6               | OH | Cl               | H    | Cl              | H               | CH <sub>3</sub>                   | H    | 760                   | 4591                  | >20000                | 6048                  | 4.66  | 8.01 | -4.88 |
| 7               | OH | Cl               | H    | Cl              | H               | COOCH <sub>3</sub>                | H    | 334                   | 8142                  | Inverted              | >20000                | 4.15  | 7.98 | -4.94 |
| 8               | OH | Cl               | H    | Cl              | H               | COOH                              | H    | >20000                | >20000                | Inverted              | >20000                | 3.67  | 4.03 | -4.54 |
| 9               | H  | Cl               | H    | Cl              | H               | NO <sub>2</sub>                   | H    | >20000                | >20000                | >20000                | >20000                | 4.63  | 14   | -5.27 |
| 10              | OH | Cl               | H    | Cl              | H               | OCH <sub>3</sub>                  | H    | 4248                  | >20000                | Inverted              | 18900                 | 4.05  | 8.02 | -4.59 |
| 11              | OH | t-Bu             | H    | Cl              | H               | NO <sub>2</sub>                   | H    | 423                   | 3407                  | 3097                  | 1921                  | 5.50  | 7.51 | -5.68 |
| 12              | OH | OCH <sub>3</sub> | H    | Cl              | H               | NO <sub>2</sub>                   | H    | 1498                  | 10290                 | 16880                 | 7529                  | 3.39  | 7.65 | -4.39 |
| 13              | OH | t-Bu             | H    | Cl              | H               | COOCH <sub>3</sub>                | H    | >20000                | 14570                 | >20000                | >20000                | 5.49  | 7.50 | -5.62 |
| 14              | OH | t-Bu             | H    | Cl              | H               | COOH                              | H    | >20000                | 14250                 | Inverted              | >20000                | 5.00  | 4.93 | -5.22 |
| 15              | OH | t-Bu             | H    | F               | H               | COOH                              | H    | >20000                | >20000                | Inverted              | >20000                | 4.41  | 4.73 | -4.69 |
| 16              | OH | t-Bu             | H    | CH <sub>3</sub> | H               | COOH                              | H    | >20000                | >20000                | Inverted              | >20000                | 4.49  | 4.95 | -4.74 |
| 17              | OH | t-Bu             | H    | Cl              | H               | H                                 | COOH | >20000                | >20000                | Inverted              | >20000                | 5.00  | 4.93 | -5.22 |
| 18              | OH | t-Bu             | t-Bu | Cl              | H               | CH <sub>3</sub> SO <sub>2</sub> N | H    | >20000                | >20000                | Inverted              | >20000                | 5.98  | 7.02 | -6.39 |
| 19              | OH | t-Bu             | t-Bu | Cl              | H               | NH <sub>2</sub>                   | H    | >20000                | 17590                 | Inverted              | >20000                | 6.58  | 7.57 | -6.14 |
| 20              | OH | t-Bu             | t-Bu | H               | CH <sub>3</sub> | COOH                              | H    | >20000                | >20000                | >20000                | >20000                | 6.52  | 4.96 | -6.10 |
| 21              | OH | Cy               | H    | Cl              | H               | COOCH <sub>3</sub>                | H    | 9910                  | >20000                | >20000                | >20000                | 5.96  | 7.50 | -6.66 |
| 22              | OH | Cy               | H    | Cl              | H               | COOH                              | H    | 4511                  | >20000                | Inverted              | >20000                | 5.48  | 4.93 | -6.26 |
| 23              | OH | CF <sub>3</sub>  | H    | CH <sub>3</sub> | H               | COOCH <sub>3</sub>                | H    | >20000                | >20000                | >20000                | >20000                | 4.97  | 7.49 | -5.15 |
| 24              | OH | Cl               | H    | Cl              | H               | CN                                | H    | 348                   | 4720                  | 1070                  | 880                   | 4.27  | 8.00 | -5.03 |
| 25              | OH | H                | t-Bu | Cl              | H               | COOCH <sub>3</sub>                | H    | >20000                | >20000                | Inverted              | >20000                | 5.22  | 7.52 | -5.52 |
| 26              | OH | t-Bu             | t-Bu | Cl              | H               | COOH                              | H    | >20000                | >20000                | >20000                | >20000                | 6.77  | 4.93 | -6.48 |
| 27              | OH | t-Bu             | t-Bu | Cl              | H               | COOCH <sub>3</sub>                | H    | 16500                 | >20000                | >20000                | >20000                | 6.52  | 4.96 | -6.10 |
| 28              | OH | OCH <sub>3</sub> | H    | CH <sub>3</sub> | H               | COOH                              | H    | >20000                | >20000                | Inverted              | >20000                | 2.38  | 4.95 | -3.46 |
| 29              | OH | H                | t-Bu | Cl              | H               | COOCH <sub>3</sub>                | H    | >20000                | >20000                | Inverted              | >20000                | 5.22  | 7.52 | -5.52 |
| 30              | OH | H                | t-Bu | Cl              | H               | COOH                              | H    | >20000                | >20000                | Inverted              | >20000                | 4.74  | 4.93 | -5.12 |
| 31              | OH | H                | t-Bu | Cl              | H               | NO <sub>2</sub>                   | H    | >20000                | 7214                  | >20000                | 1110                  | 5.24  | 7.52 | -5.58 |
| 32              | OH | H                | t-Bu | Cl              | H               | NH <sub>2</sub>                   | H    | >20000                | >20000                | >20000                | >20000                | 4.55  | 7.58 | -4.78 |
| 33              | OH | H                | t-Bu | Cl              | H               | NSO <sub>2</sub> CH <sub>3</sub>  | H    | 2879                  | >20000                | Inverted              | >20000                | 3.95  | 7.03 | -5.03 |
| 34              | OH | Cl               | H    | Cl              | H               | Br                                | H    | 760                   | 5473                  | 3491                  | 3620                  | 4.97  | 8.01 | -5.36 |

691
